# Supplementary material
Source: PubMed Central journal article supplement (PMC2993595)
Supplement: JCI43786sd.pdf [file JCI43786sd.pdf]

## Supplemental Figure 1

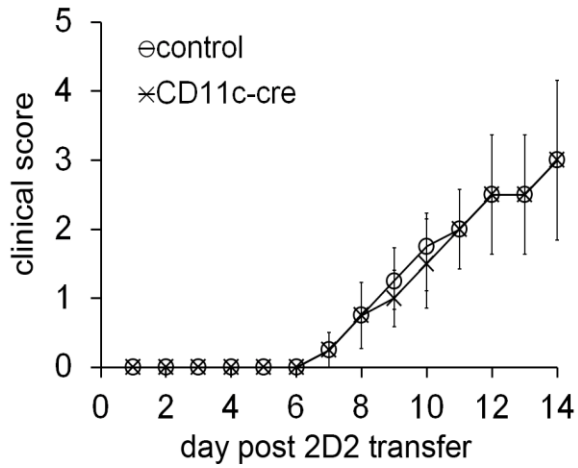

Supplemental Figure 1. Mice lacking integrin  $\alpha\beta8$  on DCs develop EAE after passive immunization with activated 2D2 T cells. 2D2 T cells were activated as described in Methods and  $2.5 \times 10^6$  were transferred into control or  $\beta8^{fl/fl} \times CD11c\text{-cre}$  mice. Mice were given 400ng pertussis toxin at the time of cell transfer and 2 days later. EAE was scored as described in Methods.
